# Supplementary material for: Detection of Human Papillomaviruses by Polymerase Chain Reaction and Ligation Reaction on Universal Microarray
Source: PLOS journal article supplement (doi:10.1371/journal.pone.0034211), 2012-03-23
Supplement: S5 (10.1371/journal.pone.0034211.s005) [file journal.pone.0034211.s005]

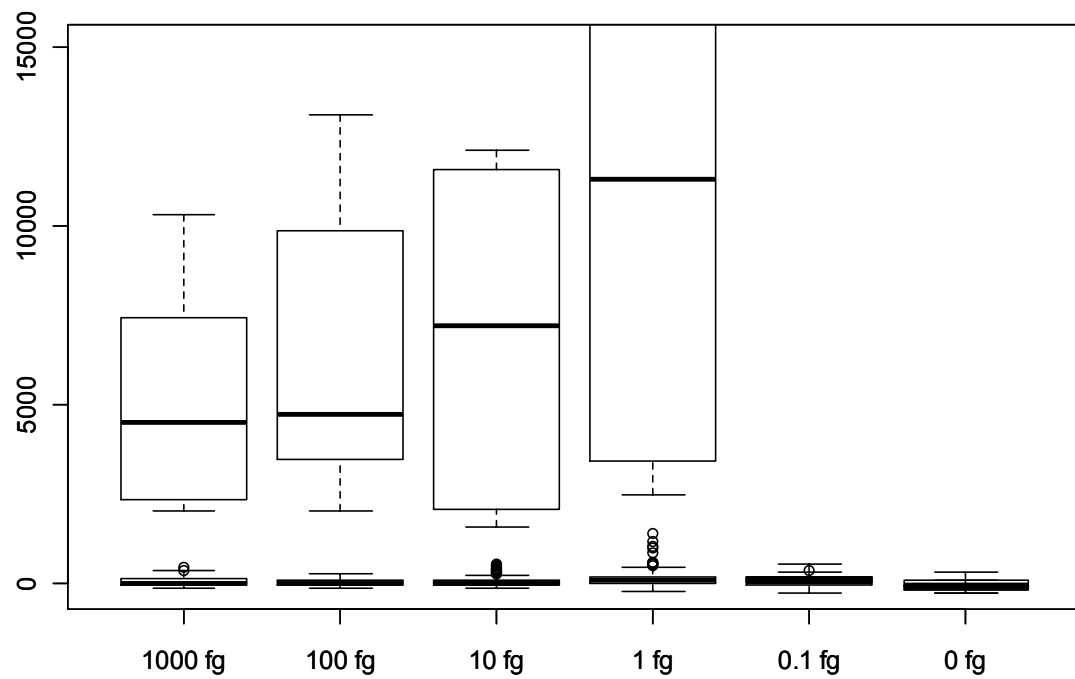

Dilution series of HPV16 and 18 plasmid PCR templates at concentrations from 1000 fg to 0 fg. The PCR amplicons were detected by LDR on microarray. The upper boxplots represent microarray signals from HPV16 and 18 LDR probes. The lower boxplots represent signals from other HPV LDR probes.
